# Supplementary material for: Zepto-molar electrochemical detection of Brucella genome based on gold nanoribbons covered by gold nanoblooms
Source: PubMed Central journal article supplement (PMC4677304; doi:10.1038/srep18060), 2015-12-14
Supplement: srep18060-s1.pdf [file srep18060-s1.pdf]

## Supplementary materials

### **Zepto-molar electrochemical detection of *Brucella* genome based on gold nanoribbons covered by gold nanoblooms**

Amid Rahi<sup>1</sup>, Naghmeh Sattarahmady<sup>1,2,3\*</sup> and Hossein Heli<sup>1,2\*</sup>

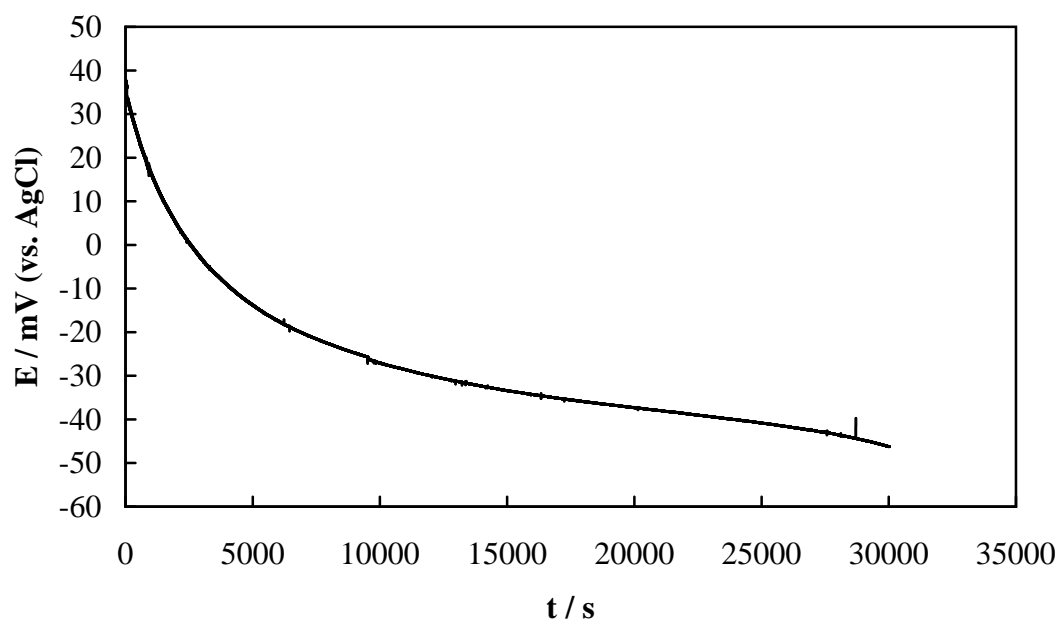

**S1**

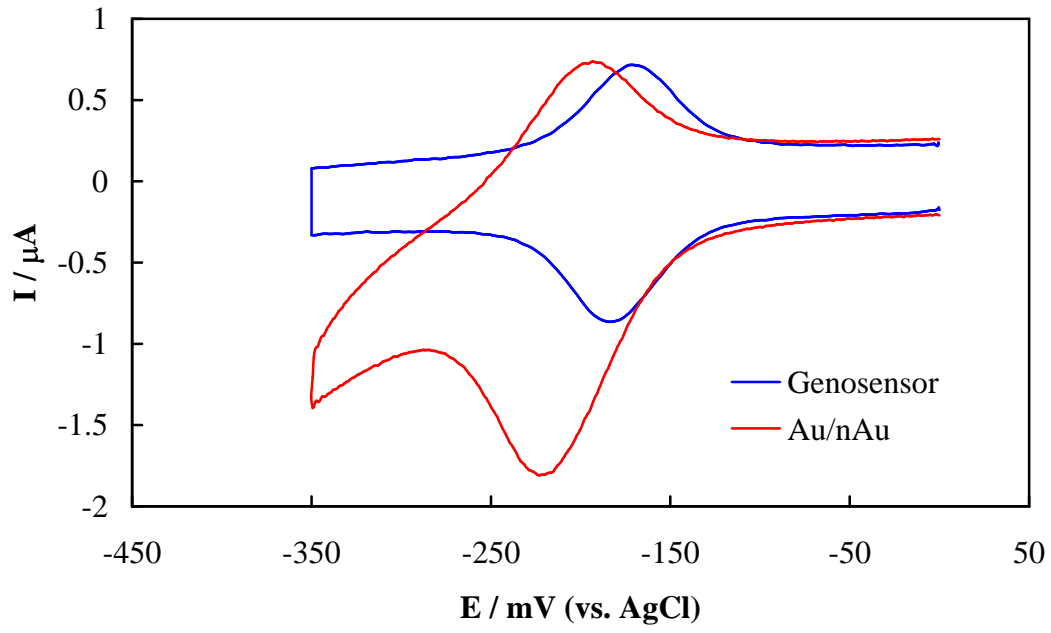

S2

Supplementary material S3: A comparison of the figure of merit of some genosensors.

| Probe sequence                                                                                                  | Redox indicator    | Substrate       | Detection technique | LOD        | Linear range | Real Sample                 | Reference |
|-----------------------------------------------------------------------------------------------------------------|--------------------|-----------------|---------------------|------------|--------------|-----------------------------|-----------|
| 5'-GTGGTGGGCTGGGCGATCAA-p-(CH <sub>2</sub> ) <sub>3</sub> -SH                                                   | MB                 | Au              | CC, SWV, CV         | -          | -            | <i>Aeromonas hydrophila</i> | S1        |
| 5'-SH-(CH <sub>2</sub> ) <sub>6</sub> -ACCACGACGTTGTAAAACGACGGCCAGTCT AT-3'                                     | Ag NPs             | GC              | ASV                 | 0.5 pM     | 1-600 pM     | -                           | S2        |
| NH <sub>2</sub> -C <sub>12</sub> -5'-GCACCTGACTCCTGTGGAGAAGTCTGCCGT-3'                                          | Label-free         | PAN/PAC         | EIS                 | 20 nM      | 50-200 nM    | -                           | S3        |
| 5'-NH <sub>2</sub> -GAGCGCGCAACATTCAGGTGGA-3'                                                                   | Ferro/ferricyanide | Au              | EIS                 | -          | -            | -                           | S4        |
| 5'-NH <sub>2</sub> -GCCACAAACACCACAAGAGT-3'                                                                     | Ferro/ferricyanide | Au/PAN          | CV, DPV, EIS        | 0.31 pM    | 1 pM-1 μM    | -                           | S5        |
| 5'-SH-(CH <sub>2</sub> ) <sub>6</sub> -AATGTATAATTGCGCGACTCTAATC-3'                                             | Label-free         | Au NPs          | DPV                 | 35 fM      | 0.1 pM-10 nM | -                           | S6        |
| 5'-IATTTTCTTCCTTTTITTC-3'                                                                                       | Label-free         | Pencil graphite | CP                  | 0.5 mg/L   | 10-30 mg/L   | BRCA1 breast cancer gene    | S7        |
| 5-NH <sub>2</sub> -GAGCGGCGCAACATTCAGGTGCA-3'                                                                   | Daunomycin         | MWCNTs          | DPV                 | 0.1 nM     | 0.2-50 nM    | -                           | S8        |
| 5'-NH <sub>2</sub> -CAAGACCACCACTTCGAAACC-3'                                                                    | Label-free         | SWCNTs          | DPV                 | 0.15 μg/mL | 25-40 μg/mL  | Calf thymus DNA             | S9        |
| 5'-NH <sub>2</sub> -AGTTGCTGATGGTCCTCATGCTGGC-3'                                                                | Label-free         | GC              | EIS                 | 0.50 nM    | 1-20 nM      | -                           | S10       |
| 5'-GCCAGCGTTCAATCTGAGCCATGATCAAACCTCTTCAAATGCCGATTAGGC-(A) <sub>6</sub> -(CH <sub>2</sub> ) <sub>6</sub> -SH-3' | Os-C1              | Au              | Amp, CV             | 600 fM     | 1.0-300 pM   | -                           | S11       |
| 5'-HS(CH <sub>2</sub> ) <sub>6</sub> GCGTTCCAAAGGGCAGGATCATTGA-3'                                               | Os-C2              | Au              | CV, DPV             | 6 pmol     | 5-20 pmol    | <i>Helicobacter pylori</i>  | S12       |

|                                                                           |                                                       |                                         |          |          |                |                              |     |
|---------------------------------------------------------------------------|-------------------------------------------------------|-----------------------------------------|----------|----------|----------------|------------------------------|-----|
| 5'-GGGGCAGAGCCTCACAACCT-(CH <sub>2</sub> ) <sub>3</sub> -SH-3'            | AQMS                                                  | Au                                      | CV, OSWV | 0.5 nM   | -              | -                            | S13 |
| 5'-CGACAGTGGTCCCAAAGA-3'                                                  | Ferro/ferricyanide                                    | SWNTs                                   | DPV      | 20 nM    | 40-110 nM      | -                            | S14 |
| 5'-PO <sub>4</sub> -GAGCGGCGCAACATTTTCAGGTCGA-3'                          | Daunomycin                                            | Chit/PB/GPE                             | DPV, CV  | 0.16 pM  | 0.21pM-21.2 nM | -                            | S15 |
| 5'-GGGCACTCTTGCCTACGCCATCAGCTCCAACCTACCACAAGTTTT-3'                       | Daunomycin                                            | MWNTs/ZrO <sub>2</sub> NPs/Chit         | DPV      | 75 pM    | 14.9-93.2 nM   | -                            | S16 |
| 5'-HS-TATTAACCTTTACTCC-3'                                                 | p-Aminophenol                                         | Au                                      | CA, CV   | 1 pM     | -              | <i>E. Coli</i>               | S17 |
| 5'-GCCACAAACACCACAAGAGT-3'                                                | MB                                                    | Au NPs/PDC                              | DPV, CV  | 24 pM    | 10 nM-10 μM    | -                            | S18 |
| 5'-HS-(CH <sub>2</sub> ) <sub>6</sub> -ACTGCTAGAGATTTTCCACAT-3'           | Label-free                                            | B2dMPTS                                 | EIS      | 5 nM     | 10 nM-1 μM     | -                            | S19 |
| 5'-TGGACGTGGCTTAGCGTATATT-3'                                              | MB                                                    | Chit-Co <sub>3</sub> O <sub>4</sub> -GR | DPV      | 0.43 pM  | 1 pM-1 μM      | <i>Staphylococcus aureus</i> | S20 |
| NH <sub>2</sub> -C <sub>6</sub> -5'-AAGCGGAGGATTGACGACTA-3'               | Ferro/ferricyanide                                    | PAMAM-Au                                | EIS      | 3.8 pM   | 10-100 pM      | -                            | S21 |
| 5'-GAAACACCAATGATATTTTC-3'                                                | Label-free                                            | MWCNTs                                  | EIS      | 100 pM   | 20-80 nM       | Cystic Fibrosis mutant gene  | S22 |
| 5'-HS(CH <sub>2</sub> ) <sub>6</sub> GTATCTACCACAGTAACAA A-3'             | Hematoxylin                                           | Au                                      | CV, DPV  | 3.8 nM   | 12.5-350.0 nM  | Human papilloma virus        | S23 |
| 5'-SH-(CH <sub>2</sub> ) <sub>6</sub> -ACCCTTGGGAGGAAGAGACG-3'            | hydroquinone                                          | Au NPs                                  | Amp      | 5.22 nM  | 0.53-25 nM     | -                            | S24 |
| 5'-HS-(CH <sub>2</sub> ) <sub>6</sub> -GCACGCTAGATGAGTCCGTCCTGCTGCGTGC-3' | Ferro/ferricyanide                                    | Au                                      | DPV, CV  | 0.167 pM | 0.5 pM-50 nM   | -                            | S25 |
| 5'-PO <sub>4</sub> -GGGGGGCCAAGGCCAGCCCTCACACA-3'                         | [Ru(NH <sub>3</sub> ) <sub>5</sub> Cl]PF <sub>6</sub> | NiO <sub>x</sub> NPs                    | EIS, DPV | 68 pM    | 0.4-10 nM      | -                            | S26 |
| 5'-(NH <sub>2</sub> -C <sub>6</sub> )ATCAATATTTAACAATAATCC-3'             | Daunomycin                                            | Au                                      | DPV      | 0.13 pM  | 1 pM-0.1 μM    | -                            | S27 |
| 5'-TGGAAATCTTTTTTTGAAAGGCTTTGG-3'                                         | MB                                                    | poly-Lysine                             | CV, DPV  | 4.35 nM  | 5-100 nM       | Bovine papilloma virus       | S28 |

|                                                                                                                                         |                                                    |                                            |          |           |                  |                                        |     |
|-----------------------------------------------------------------------------------------------------------------------------------------|----------------------------------------------------|--------------------------------------------|----------|-----------|------------------|----------------------------------------|-----|
| 5'-HS-(CH <sub>2</sub> ) <sub>6</sub> CGATTCCGGTACTGG-3'                                                                                | TMB                                                | Pt<br>NPs/CNTs                             | CA       | 0.6 fM    | 1.0 fM-10 pM     | -                                      | S29 |
| 5'-<br>ATTGACCGCTGTGTGACGCAACACT<br>CAATTTCTCCAGTGTAGTATTAGGC<br>AATGAAATTGAGTGTTTTTTTTTTTTT-<br>(CH <sub>2</sub> ) <sub>3</sub> -SH-3' | TMB                                                | Au                                         | CV, Amp  | 13.6 amol | 100-100000<br>pM | -                                      | S30 |
| 5'-GCATATGCAAATGGAACACCTCA-<br>3'                                                                                                       | MB                                                 | Chit-MgO                                   | CV, DPV  | 35.2 mg/L | 0.1-0.5 mg/L     | Vibrio<br>cholerae                     | S31 |
| Cys-O-O-5'-<br>ATGTACCCCATGAGGTCGGC-3'                                                                                                  | MB                                                 | Au                                         | DPV      | 9.5 µg/L  | 10-300 µg/L      | Hepatitis C<br>virus                   | S32 |
| 5'-HS-(CH <sub>2</sub> ) <sub>6</sub> -<br>GTTCTTCTCATCATCGAC-3'                                                                        | MB                                                 | Aloe-like<br>Au                            | SWV      | 12 aM     | 50 aM-1 pM       | -                                      | S33 |
| 5'-HS-(CH <sub>2</sub> ) <sub>6</sub> -<br>GGCCATCGTTGAAGATGCCTCTGCC-<br>3'                                                             | [Ru(NH <sub>3</sub> ) <sub>6</sub> ] <sup>3+</sup> | PAN-Chit-<br>Au NPs                        | CC       | 80 aM     | 0.1-10 fM        | -                                      | S34 |
| 5'-AATTT-CCCC-AAATT-3'                                                                                                                  | PIND-Ru                                            | CPE                                        | CV       | 1.5 pM    | 2.5-350 pM       | -                                      | S35 |
| 5'-GAG-GAG-TTG-GGG-GAG-CAC-<br>ATT-3'                                                                                                   | [Co(phen) <sub>3</sub> ] <sup>3+</sup>             | CPE                                        | DPV      | 15 mg/L   | -                | Hepatitis B<br>virus                   | S36 |
| 5'-SH(CH <sub>2</sub> ) <sub>6</sub> -<br>GCACCTGACCATAGAACGGT-3'                                                                       | MDB                                                | Au                                         | DPV, EIS | 20 nM     | -                | <i>B. anthracis</i>                    | S37 |
| 5'-CTT-TTT-CTT-TTT-GTC-CTT-TTT-<br>AGG-CTCTGT-3'-(CH <sub>2</sub> ) <sub>3</sub> -SH                                                    | Formamide                                          | Au-SPE                                     | CV       | 2.5 pM    | 2.5-50 pM        | SARS Virus                             | S38 |
| 5'-<br>(SH)GCGTTCCAAAGGGCAGGATCAT<br>TGA-3'                                                                                             | Adriamycin                                         | Au<br>NPs/rGO                              | DPV      | 35 fM     | 10 nM-0.1 pM     | -                                      | S39 |
| 5'-NH <sub>2</sub> -<br>TGGCGGCACATTTGTCACTGCA-3'                                                                                       | MB                                                 | Au/GR                                      | DPV, CV  | 0.29 pM   | 1 pM-1 µM        | <i>Listeria<br/>monocytogene<br/>s</i> | S40 |
| 5'-AACCACACAACCTACTACCTCA-3'                                                                                                            | MB                                                 | ITO                                        | DPV      | 0.55 pM   | 1 pM-0.1 µM      | -                                      | S41 |
| 5'-GAAGCTGGCAACGCTACCGGT-3'                                                                                                             | MB                                                 | Chit/Fe <sub>3</sub> O <sub>4</sub><br>-GR | DPV, EIS | 0.36 pM   | 1 pM-1 µM        | Soybean<br>Lectin                      | S42 |
| 5'-<br>NH <sub>2</sub> (CH <sub>2</sub> ) <sub>6</sub> TCGATACTCTCCCCGCC<br>CTTTGTATCGACG-3'                                            | Ferro/ferricyanide                                 | Alumina<br>nanochannels                    | DPV, EIS | 0.3 pM    | 1 pM-1 µM        | Legionella<br>spp.                     | S43 |
| 5'-CTTTTGTTC-3'                                                                                                                         | Au-NPs                                             | GR                                         | CV, CA   | 1 fM      | 0.1 fM-0.1 nM    | BRCA1 gene                             | S44 |

|                                                                                        |                    |                     |          |         |             |                                           |           |
|----------------------------------------------------------------------------------------|--------------------|---------------------|----------|---------|-------------|-------------------------------------------|-----------|
| 5'-SH-(CH <sub>2</sub> ) <sub>6</sub> -<br>AAAACCCCTCCTCAACCCCT-3'                     | Adriamycin         | Au NRs              | DPV      | 0.35 aM | 0.1 fM-1 nM |                                           | S45       |
| 5'-SH-(CH <sub>2</sub> ) <sub>6</sub><br>TTTTATGTGGCGGATGAGCGGCA-3'                    | Ferro/ferricyanide | Au                  | DPV, EIS | 8.7 fM  | 10 fM-1 nM  | Enterobacteria<br>ceae                    | S46       |
| 5'-HS-(CH <sub>2</sub> ) <sub>6</sub> -<br>GCAGGTATGCACAGTGAGTCTGGGC<br>CGTGTCTCAGT-3' |                    | Au                  | DPV      | 80 aM   | 0.1-20 fM   | <i>Bacillus<br/>subtilis</i>              | S47       |
| 5' -SH-(CH <sub>3</sub> ) <sub>10</sub> TGC CGA TCA CTT AAG<br>GGC CTT CAT-3'          | MB                 | Au<br>nanostructure | DPV      | 1.71 zM | 10 zM-1 pM  | Human<br>subjects,<br>cultured<br>samples | This work |

#### Abbreviations:

Limit of detection, LOD

Methylene blue, MB

Chronocoulometry, CC

Square wave voltammetry, SWV

Cyclic voltammetry, CV

Anodic stripping voltammetry, ASV

Electrochemical impedance spectroscopy, EIS

Nanoparticles, NP

Polyaniline, PAN

Polyacrylate, PAC

Differential pulse voltammetry (voltammogram), DPV

Chronopotentiometry, CP

Multi wall carbon nanotube, MWNT

Single wall carbon nanotube, SWCNT

Glassy carbon, GC

Amperometry, Amp

N,N'-bis[(3-propyl)imidazole]-1,4,5,8-naphthalene diimide, PIND

PIND-Os, Os-C1

Os(phen)<sub>2</sub>(phen-dione)]<sup>3+/2+</sup>, Os-C2  
Anthraquinonemonosulfonic acid, AQMS  
Osteryoung square wave voltammetry, OSWV  
Chitosan, Chit  
Chronoamperometry, CA  
Carbon nanotube, CNT  
Carbon paste electrode, CPE  
Reduced graphene oxide, rGO  
Graphene, GR  
Indium tin oxide, ITO  
Nanorods, NRs  
Graphene paste electrode, GPE  
Prussian blue, PB  
Poly-2,6-pyridinedicarboxylic acid, PDC  
Bilayer two-dimensional 3-mercaptopropyltrimethoxysilane, B2dMPTS  
3,3',5,5' tetramethylbenzidine, TMB  
Meldola's blue, MDB  
Screen-printed electrode, SPE

#### References:

- s1- Tichoniuk M, Gwiazdowska D, Ligaj M, Filipiak M. Electrochemical detection of foodborne pathogen *Aeromonas hydrophila* by DNA hybridization biosensor. *Biosens Bioelectron* 2010;26(4):1618-1623.
- s2- Cai H, Xu Y, Zhu N, He P, Fang Y. An electrochemical DNA hybridization detection assay based on a silver nanoparticle label. *Analyst* 2002;127(6):803-808.
- s3- Huiru G, Xiao S, Kian L. Electrochemical impedance sensing of DNA hybridization on conducting polymer film-modified diamond. *J Phys Chem B* 2005;109(28):13611-13618.
- s4- Xu Y, Cai H, He PG, Fang YZ. Probing DNA hybridization by impedance measurement based on CdS□oligonucleotide nanoconjugates. *Electroanalysis* 2004;16(1□2):150-155.
- s5- Feng Y, Yang T, Zhang W, Jiang C, Jiao K. Enhanced sensitivity for deoxyribonucleic acid electrochemical impedance sensor: gold nanoparticle/polyaniline nanotube membranes. *Analytica chimica acta* 2008;616(2):144-151.



- s6- Zhang Y, Huang L. Label-free electrochemical DNA biosensor based on a glassy carbon electrode modified with gold nanoparticles, polythionine, and graphene. *Microchimica Acta* 2012;176(3-4):463-470.
- s7- Wang J, Kawde AN. Pencil-based renewable biosensor for label-free electrochemical detection of DNA hybridization. *Analytica chimica acta* 2001;431(2):219-224.
- s8- Cai H, Cao X, Jiang Y, He P, Fang Y. Carbon nanotube-enhanced electrochemical DNA biosensor for DNA hybridization detection. *Anal bioanal chem* 2003;375(2):287-293.
- s9- Kerman K, Morita Y, Takamura Y, Tamiya E. Escherichia coli single-strand binding protein-DNA interactions on carbon nanotube-modified electrodes from a label-free electrochemical hybridization sensor. *Anal Bioanal Chem* 2005;381(6):1114-21.
- s10- Xu X, Weng X, Liu A, Lin Q, Wang C, Chen W, Lin X. Electrochemical genosensor for detection of human mammaglobin in polymerase chain reaction amplification products of breast cancer patients. *Anal Bioanal Chem* 2013;405(10):3097-103.
- s11- Tansil NC, Xie H, Xie F, Gao Z. Direct detection of DNA with an electrocatalytic threading intercalator. *Anal chem* 2005;77(1):126-134.
- s12- Del Pozo MV, Alonso C, Pariente F, Lorenzo E. DNA biosensor for detection of Helicobacter pylori using phen-dione as the electrochemically active ligand in osmium complexes. *Anal chem* 2005;77(8):2550-2557.
- s13- Wong EL, Gooding JJ. Charge transfer through DNA: a selective electrochemical DNA biosensor. *Anal chem* 2006;78(7):2138-2144.
- s14- Zhang X, Jiao K, Liu S, Hu Y. Readily reusable electrochemical DNA hybridization biosensor based on the interaction of DNA with single-walled carbon nanotubes. *Anal chem* 2009;81(15):6006-6012.
- s15- Bo Y, Wang W, Qi J, Huang S. A DNA biosensor based on graphene paste electrode modified with Prussian blue and chitosan. *Analyst* 2011;136(9):1946-1951.
- s16- Yang Y, Wang Z, Yang M, Li J, Zheng F, Shen G, Yu R. Electrical detection of deoxyribonucleic acid hybridization based on carbon-nanotubes/nano zirconium dioxide/chitosan-modified electrodes. *Anal chim acta* 2007;584(2):268-274.
- s17- Walter A, Wu J, Flechsig GU, Haake DA, Wang J. Redox cycling amplified electrochemical detection of DNA hybridization: Application to pathogen E. coli bacterial RNA. *Anal chim acta* 2011;689(1):29-33.
- s18- Jie Y, Tao Y, Yuanyuan F, Kui J. A DNA electrochemical sensor based on nanogold-modified poly-2, 6-pyridinedicarboxylic acid Wlm and detection of PAT gene fragment. *Anal Biochem* 2007;365(2):24-30.
- s19- Fu Y, Yuan R, Xu L, Chai Y, Zhong X, Tang D. Indicator free DNA hybridization detection via EIS based on self-assembled gold nanoparticles and bilayer two-dimensional 3-mercaptopropyltrimethoxysilane onto a gold substrate. *Biochem engin j* 2005;23(1):37-44.

- s20- Xiaowei Q, Hongwei G, Yuanyuan Z, Xiuzhen W, Ying C, Wei S. Electrochemical DNA biosensor with chitosan-Co<sub>3</sub>O<sub>4</sub> nanorod-graphene composite for the sensitive detection of staphylococcus aureus nuc gene sequence. *Bioelectrochemistry* 2012;88(2):42–47.
- s21- Li A, Yang F, Ma Y, Yang X. Electrochemical impedance detection of DNA hybridization based on dendrimer modified electrode. *Biosens Bioelectron* 2007;22(8):1716-1722.
- s22- Bonanni A, Esplandiú MJ, del Valle M. Impedimetric genosensing of DNA polymorphism correlated to cystic fibrosis: a comparison among different protocols and electrode surfaces. *Biosens Bioelectron* 2010;26(4):1245-1251.
- s23- Nasirizadeh N, Zare HR, Pournaghi-Azar MH, Hejazi MS. Introduction of hematoxylin as an electroactive label for DNA biosensors and its employment in detection of target DNA sequence and single-base mismatch in human papilloma virus corresponding to oligonucleotide. *Biosens Bioelectron* 2011;26(5):2638-2644.
- s24- Soreta TR, Henry OY, ÓSullivan CK. Electrode surface nanostructuring via nanoparticle electronucleation for signal enhancement in electrochemical genosensors. *Biosens Bioelectron* 2011;26(9):3962-3966.
- s25- Liu Z, Zhang W, Zhu S, Zhang L, Hu L, Parveen S, Xu G. Ultrasensitive signal-on DNA biosensor based on nicking endonuclease assisted electrochemistry signal amplification. *Biosens Bioelectron* 2011;29(1):215-218.
- s26- Noorbakhsh A, Salimi A. Development of DNA electrochemical biosensor based on immobilization of ssDNA on the surface of nickel oxide nanoparticles modified glassy carbon electrode. *Biosens Bioelectron* 2011;30(1):188-196.
- s27- Zhu L, Luo L, Wang Z. DNA electrochemical biosensor based on thionine-graphene nanocomposite. *Biosens Bioelectron* 2012;35(1):507-511.
- s28- Nascimento GA, Souza EV, Campos-Ferreira DS, Arruda MS, Castelletti CH, Wanderley MS, Lima-Filho JL. Electrochemical DNA biosensor for bovine papillomavirus detection using polymeric film on screen-printed electrode. *Biosens Bioelectron* 2012;38(1):61-66.
- s29- Dong XY, Mi XN, Zhang L, Liang TM, Xu JJ, Chen HY. DNAzyme-functionalized Pt nanoparticles/carbon nanotubes for amplified sandwich electrochemical DNA analysis. *Biosens Bioelectron* 2012;38(1):337-341.
- s30- Cai Z, Song Y, Wu Y, Zhu Z, Yang CJ, Chen X. An electrochemical sensor based on label-free functional allosteric molecular beacons for detection target DNA/miRNA. *Biosens Bioelectron* 2013;15(41):783-8.
- s31- Manoj Kumar Md, Azahar Ali Md, Zafaryab VVA, Moshahid M, Ansari ZA, Ansari SG, Bansal D. Biocompatible nanostructured magnesium oxide-chitosan platform for genosensing application. *Biosens Bioelectron* 2013;45(15):181-188.
- s32- Ahour F, Pournaghi-Azar MH, Alipour E, Hejazi MS. Detection and discrimination of recombinant plasmid encoding hepatitis C virus core/E1 gene based on PNA and double-stranded DNA hybridization. *Biosens Bioelectron* 2013;15(45):287-91.
- s33- Shi L, Chu Z, Liu Y, Jin W, Chen X. Facile synthesis of hierarchically aloe-like gold micro/nanostructures for ultrasensitive DNA recognition. *Biosens Bioelectron* 2013;49(3):184-191.

- s34- Ren R, Leng C, Zhang S. A chronocoulometric DNA sensor based on screen-printed electrode doped with ionic liquid and polyaniline nanotubes. *Biosens Bioelectronics* 2010;25(9):2089-2094.
- s35- Tansil NC, Xie F, Xie H, Gao Z. An ultrasensitive nucleic acid biosensor based on the catalytic oxidation of guanine by a novel redox threading intercalator. *Chem Commun* 2005;12(8):1064-1066.
- s36- Erdem A, Kerman K, Meric B, Akarca US, Ozsoz M. DNA electrochemical biosensor for the detection of short DNA sequences related to the hepatitis B virus. *Electroanalysis* 1999;11(8):586-587.
- s37- Kara P, Meric B, Ozsoz M. Application of impedimetric and voltammetric genosensor for detection of a biological warfare: Anthrax. *Electroanalysis* 2008;20(24):2629-2634.
- s38- Martínez-Paredes G, González-García MB, Costa-García A. Genosensor for SARS Virus Detection Based on Gold Nanostructured Screen-Printed Carbon Electrodes. *Electroanalysis* 2009;21(3-5):379-385.
- s39- Zhang Y, Jiang W. Decorating graphene sheets with gold nanoparticles for the detection of sequence-specific DNA. *Electrochimica Acta* 2012;71(3):239-245.
- s40- Sun W, Qi X, Zhang Y, Yang H, Gao H, Chen Y, Sun Z. Electrochemical DNA biosensor for the detection of *Listeria monocytogenes* with dendritic nanogold and electrochemical reduced graphene modified carbon ionic liquid electrode. *Electrochimica Acta* 2012;85:145-151.
- s41- Du D, Guo S, Tang L, Ning Y, Yao Q, Zhang GJ. Graphene-modified electrode for DNA detection via PNA-DNA hybridization. *Sens Actuat B Chem* 2013;186(5):563-570.
- s42- Wei S, Xiaowei Q, Ying C, Shengyun L, Hongwei G. Application of chitosan/Fe<sub>3</sub>O<sub>4</sub> microsphere-graphene composite modified carbon ionic liquid electrode for the electrochemical detection of the PCR product of soybean Lectin gene sequence. *Talanta* 2011;87(9):106-112.
- s43- Rai V, Deng J, Toh CS. Electrochemical nanoporous alumina membrane-based label-free DNA biosensor for the detection of *Legionella* sp. *Talanta* 2012;98(13):112-117.
- s44- Rasheed PA, Sandhyarani N. Graphene-DNA electrochemical sensor for the sensitive detection of BRCA1 gene. *Sens Actuat B Chem* 2014;204(12):777-782.
- s45- Shi A, Wang J, Han X, Fang X, Zhang Y. A sensitive electrochemical DNA biosensor based on gold nanomaterial and graphene amplified signal. *Sens Actuat B Chem* 2014;200(10):206-212.
- s46- Caihui L, Hua T, Wei C, Li Y, Decai Z, Huangxian J, Shijia D. A sensitive electrochemical DNA biosensor for specific detection of Enterobacteriaceae bacteria by Exonuclease III-assisted signal amplification. *Biosens Bioelectron* 2013;48(4):132-137.
- s47- Hu Y, Xu X, Liu Q, Wang L, Lin Z, Chen G. Ultrasensitive Electrochemical Biosensor for Detection of DNA from *Bacillus subtilis* by Coupling Target-Induced Strand Displacement and Nicking Endonuclease Signal Amplification. *Anal chem* 2014;86(17): 8785-8790.

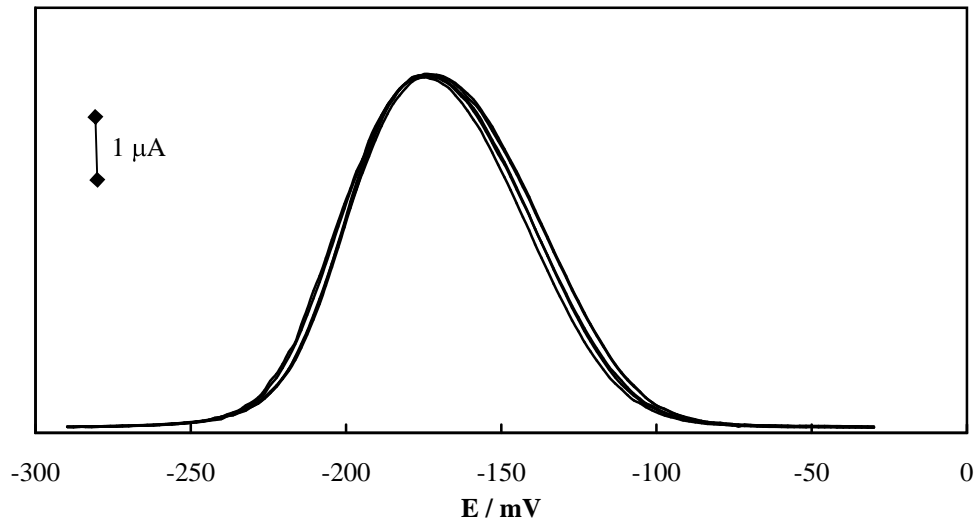

**S4**

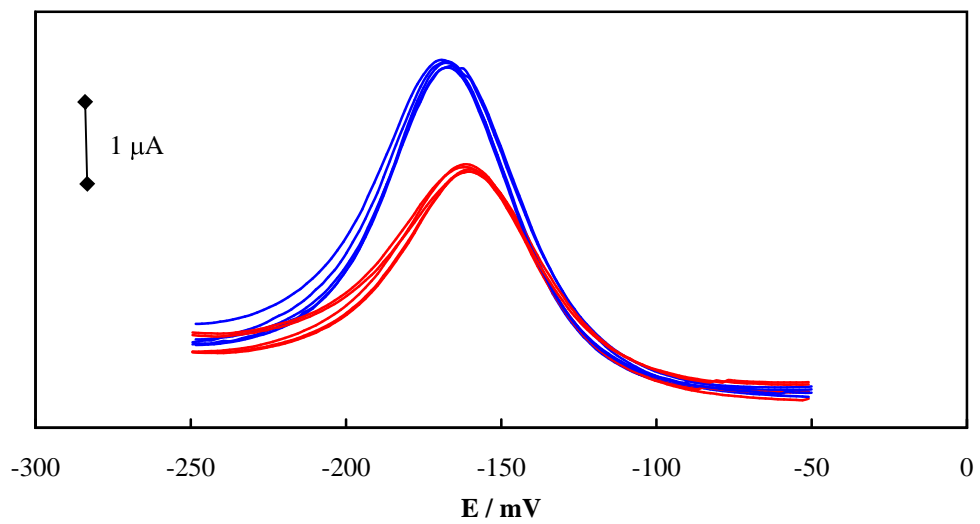

S5

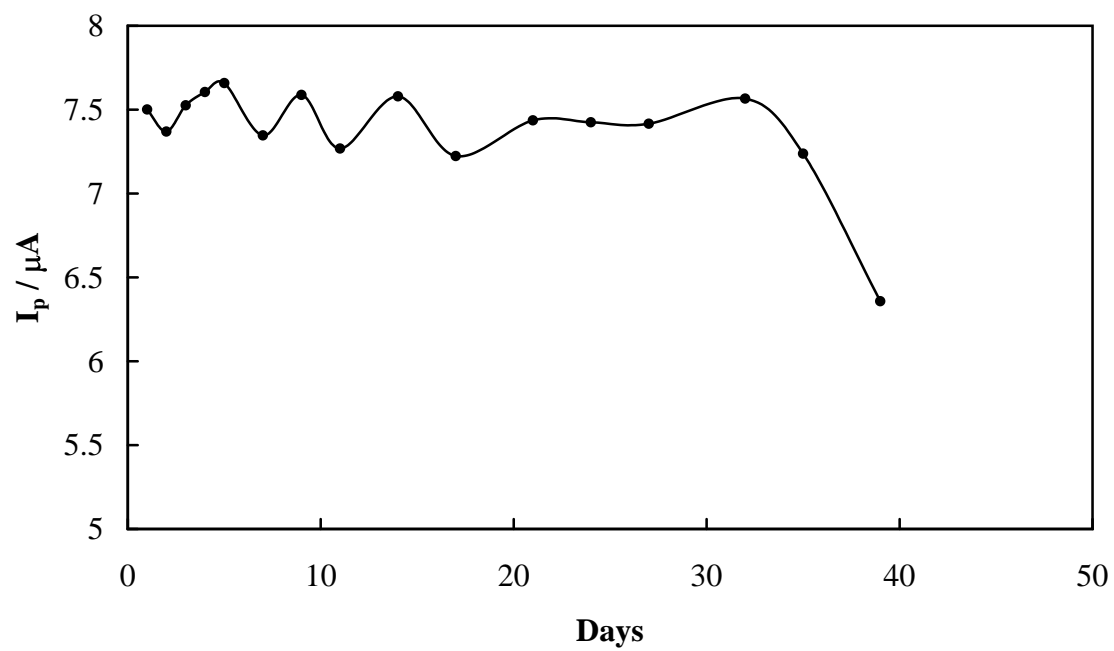

S6

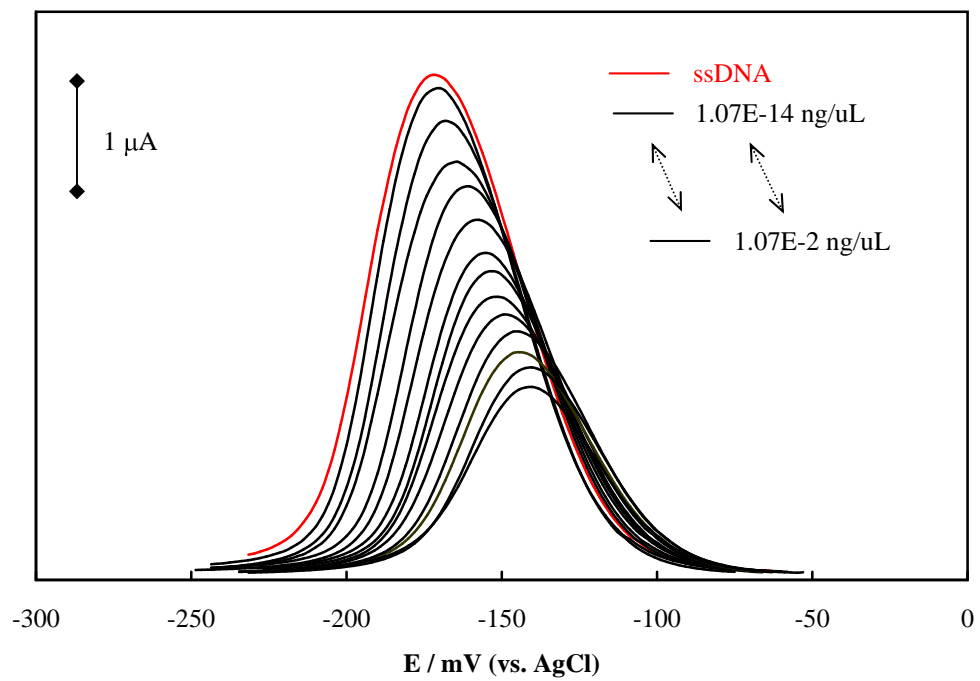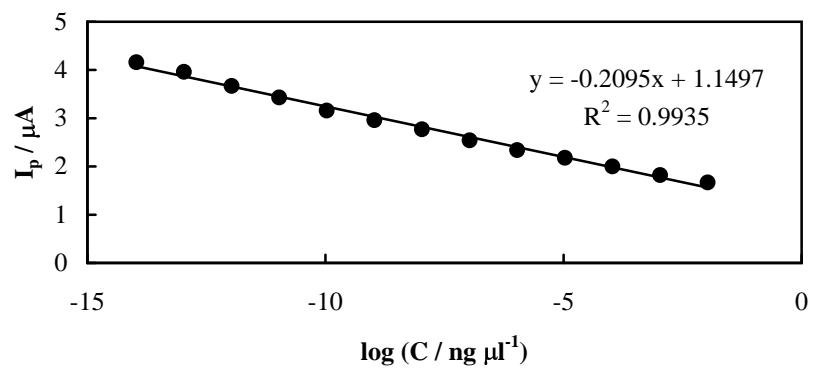

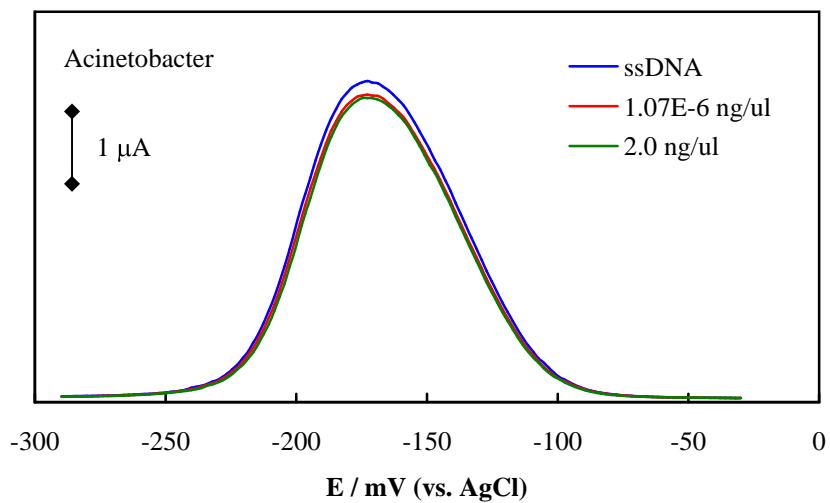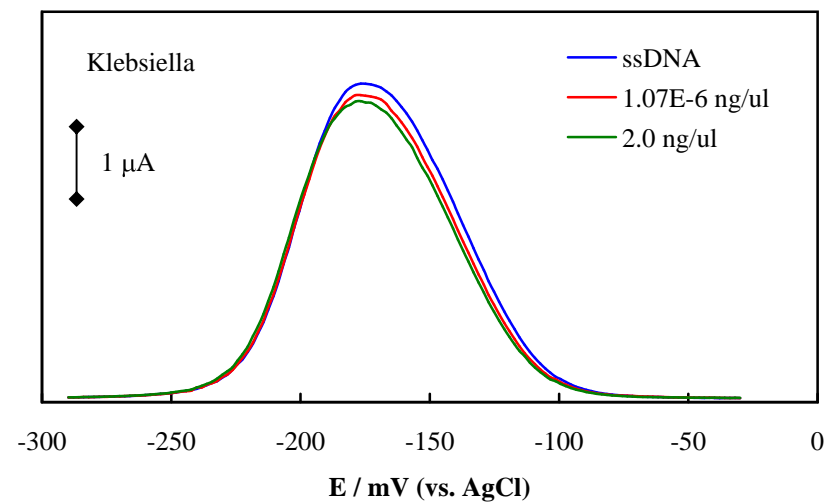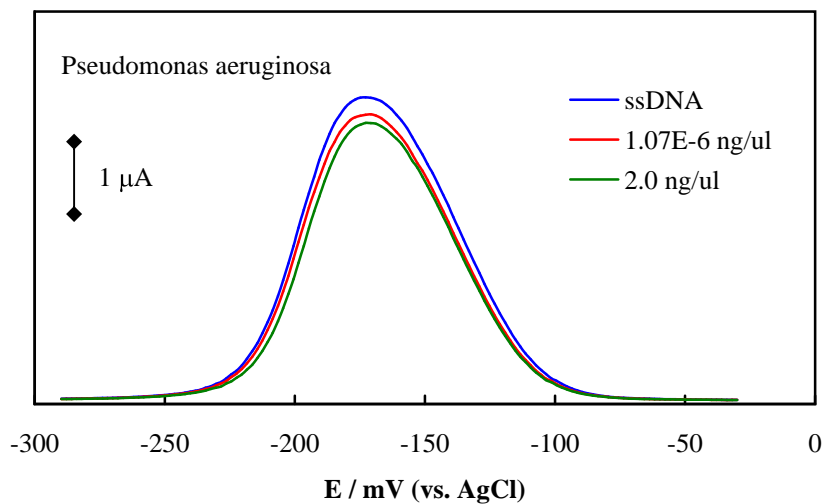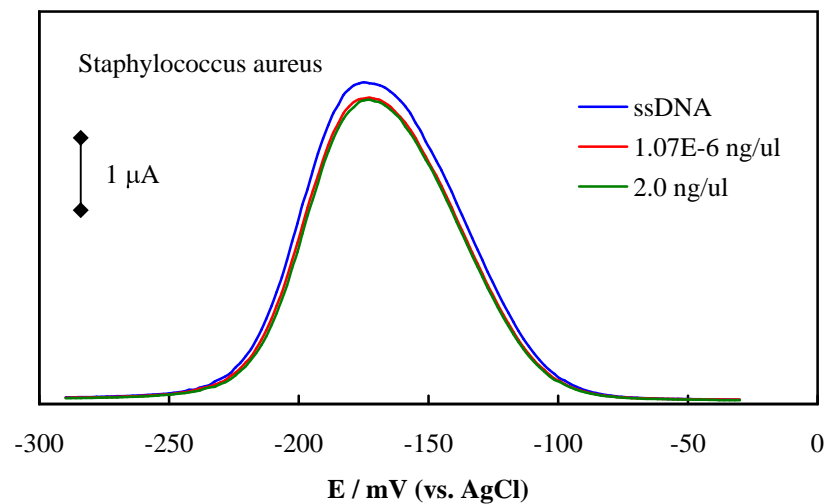



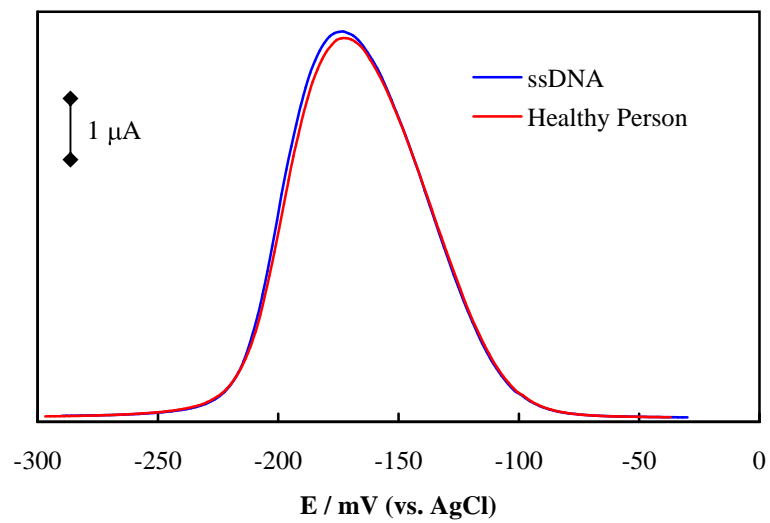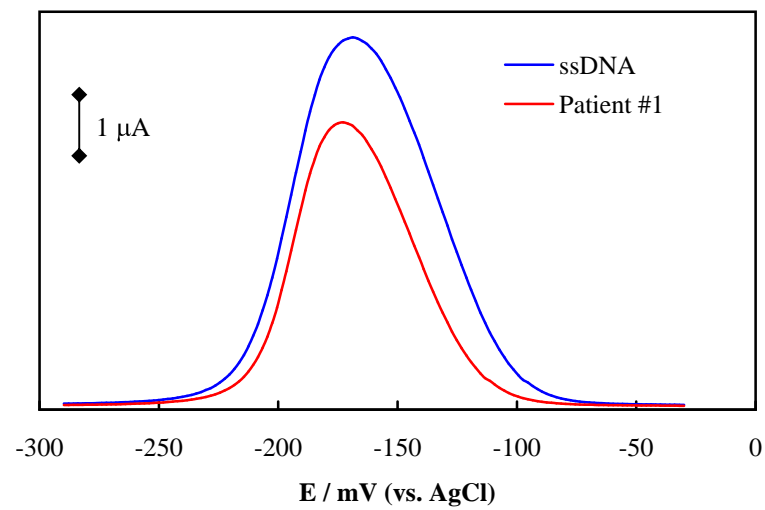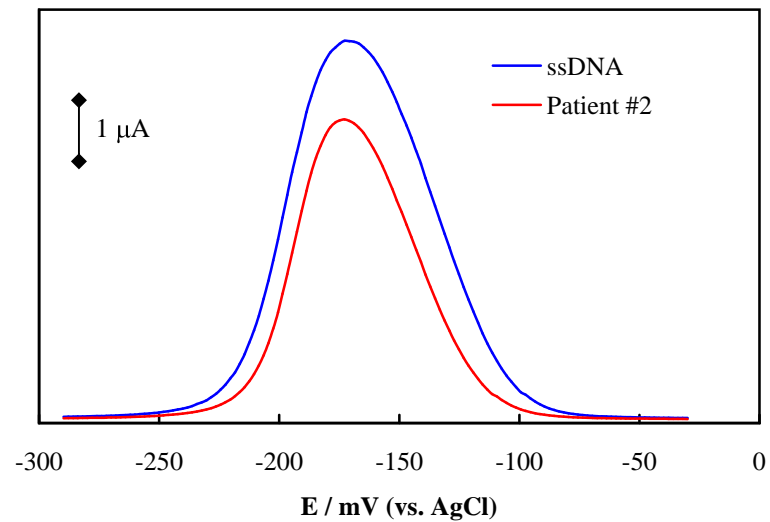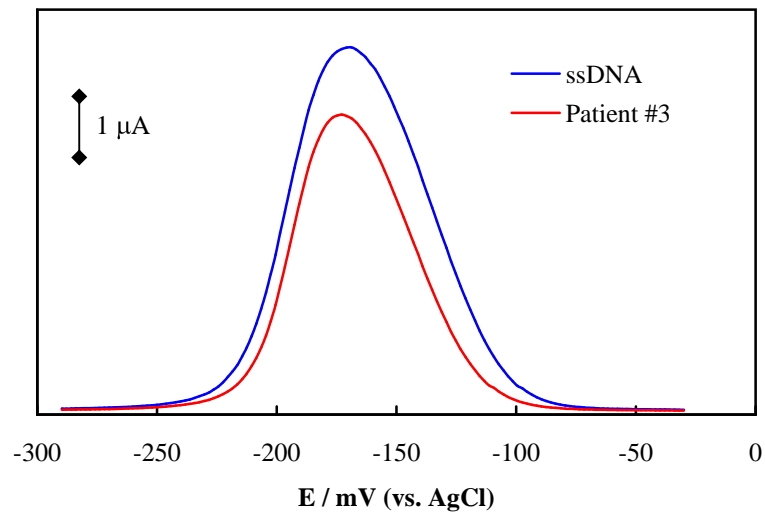

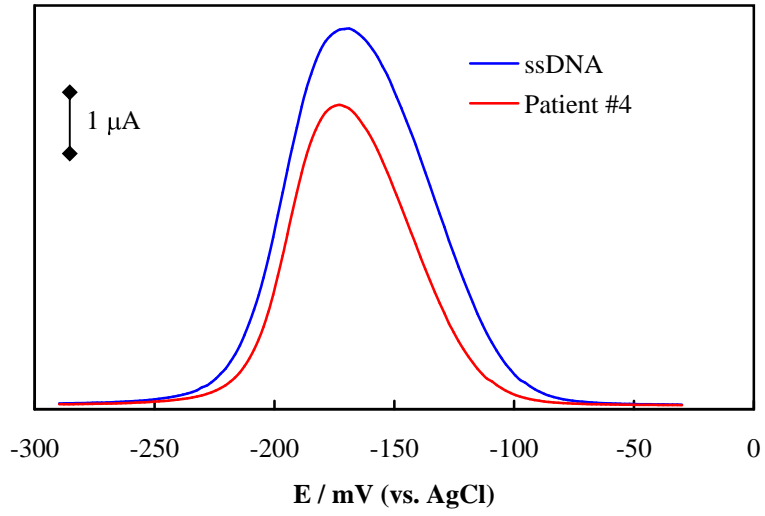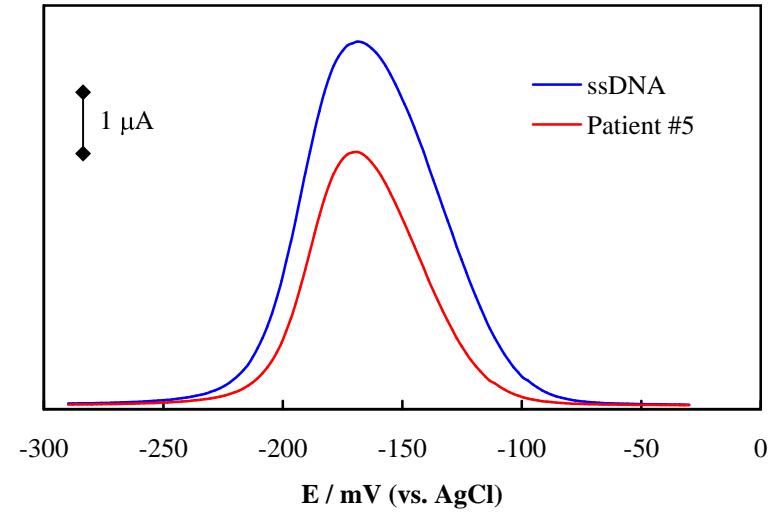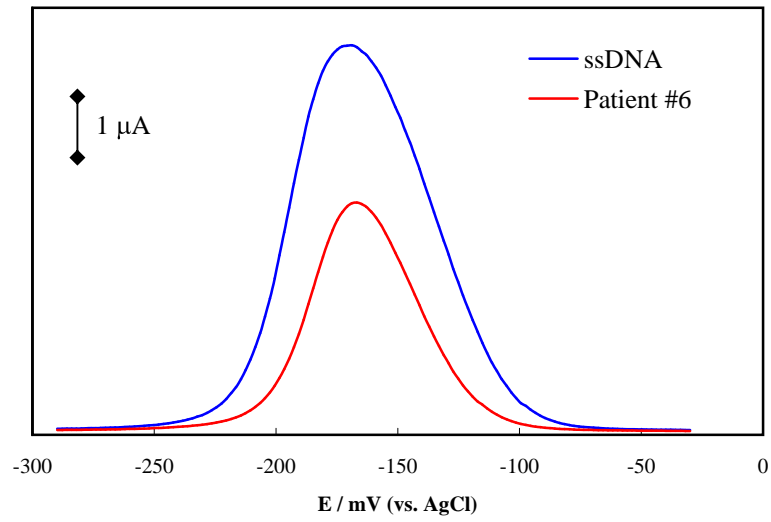

Legends of supplementary materials:

- S1: Variation of OCP of the Au/nAu electrode during the self-assembling process of p-ssDNA on its surface.
- S2: Cyclic voltammograms MB obtained using the genosensor (intercalated MB) and the Au/nAu electrode (... M MB present in the solution phase). The potential sweep rate was  $50 \text{ mV s}^{-1}$ .
- S3: A comparison of the figure of merit of some genosensors.
- S4: DPVs of the genosensor recorded for the repeating fabrication.
- S5: DPVs recorded for the regeneration of the genosensor. Blue curves show DPVs for the genosensor before hybridization, and red curves show DPVs for the genosensor before re-hybridization.
- S6: Variation of the peak current in DPVs for  $1.0 \times 10^{-10} \text{ mol dm}^{-3}$  t-ssDNA over 39 days to check the stability of the genosensor.
- S7: DPVs for MB recorded using the genosensor at different concentrations of the *Brucella* DNA genome (A), and the dependency of the peak current on concentration (B).
- S8: DPVs for MB recorded using the genosensor at two concentrations of bacterial genomes of *Pseudomonas aeruginosa*, *Staphylococcus aureus*, *Klebsiella* and *Acinetobacter* (negative controls).
- S9: DPVs for MB recorded using the genosensor for the healthy and patient samples.

## Details of materials and methods

### *Materials*

All chemicals were of analytical grade from Merck (Germany) or Sigma (USA) and were used without further purification. All solutions were prepared by redistilled water. A 24 base thiolated oligonucleotide probe (probe oligonucleotide, p-ssDNA) was designed based on the common genomic sequence in all the *Brucella* species. p-ssDNA was ordered from Vivantis (Malaysia). A complementary-sequence oligonucleotide (target oligonucleotide, t-ssDNA), one-base mismatched oligonucleotide (1m-ssDNA), two-base mismatched oligonucleotide (2m-ssDNA), three-base mismatched oligonucleotide (3m-ssDNA), and noncomplementary sequence oligonucleotide (nc-ssDNA) were purchased from SinaClon BioScience Co. (Iran). The oligonucleotide sequences are as follows:

p-ssDNA sequence: 5' SH-(CH<sub>3</sub>)<sub>6</sub> TGC CGA TCA CTT AAG GGC CTT CAT 3';

t-ssDNA sequence: 5'-ATG AAG GCC CTT AAG TGA TCG GCA-3'

nc-ssDNA sequence: 5'-AGA CCA AAA AGG CCA CCC CCG GGT-3'

1m-ssDNA sequence: 5'- ATA AAG GCC CTT AAG TGA TCG GCA-3'

2m-ssDNA sequence: 5'- ATG AAG TAC CTT AAG TGA TCG GCA-3'

3m-ssDNA sequence: 5'- ATA AAG TCC CTT AAG TAA TCG GCA-3'

The oligonucleotide stock solutions were prepared with 20 mmol dm<sup>-3</sup> Tris-HCl buffer, pH 7.4 solution (Tris) and were kept frozen.

### *Apparatus*

Electrochemical measurements were carried out in a conventional three-electrode cell powered by a  $\mu$ -Autolab potentiostat/galvanostat (the Netherlands). An Ag/AgCl, 3

mol dm<sup>-3</sup> KCl, a platinum wire, and a bare (Au, 2 mm of diameter) or modified gold disk electrode with gold nanoribbons covered by gold nanoblooms (Au/nAu) were used as the reference, counter and working electrodes, respectively. The system was run on a PC by GPES 4.9 software.

DNA samples for PCR amplification were extracted from *Brucella* strains, *Pseudomonas aeruginosa*, *Staphylococcus aureus*, *Klebsiella* and *Acinetobacter*. The PCR reaction was performed on an Eppendorf Mastercycler Gradient PCR system (USA). To measure the concentration of the extracted DNA samples, Thermo Scientific NanoDrop 2000c (USA) was employed.

In order to obtain information about the morphology and size of gold nanostructures, field emission scanning electron microscopy (FESEM) was performed using a Zeiss, Sigma-IGMA/VP (Germany). The samples were coated by a 2-5-nm thin film of gold through sputtering.

#### *Preparation of the modified electrode*

Before sonoelectrodeposition of gold nanoribbons was covered by gold nanoblooms, the Au electrode was polished on a sand papers and then on a polishing pad with 50 nm-alumina powder lubricated by glycerin. Polishing was continued to attain a mirror-like Au electrode surface. The electrode was then cleaned by immersion in a 1:3 water/ethanol mixture and ultrasonication for 8 min in an ultrasound bath. The electrode was further electropolished by immersion in a 500 mmol dm<sup>-3</sup> H<sub>2</sub>SO<sub>4</sub> solution and applying potential in the range of cathodic to anodic edges of the electrolyte stability in a regime of cyclic voltammetry for 20 consecutive cycles. Upon this pretreatment, clean

and stable Au electrode surface was attained. The Au electrode was then placed in the cell containing the synthesis solutions comprising  $5 \text{ mmol dm}^{-3} \text{ HAuCl}_4 + 0.5 \text{ mol dm}^{-3} \text{ KCl}$ . Sonoelectrodeposition of gold nanoribbons covered by gold nanoblooms was performed at  $-1800 \text{ mV}$  for  $300 \text{ s}$ , while the synthesis solution and also the Au electrode surface were irradiated by ultrasound wave of  $45 \text{ W}$  power. The modified electrode was then rinsed thoroughly with distilled water. For preparation of the Au/nAu electrode for open circuit potential (OCP) measurements, an Au screen-printed electrode was directly transferred to the synthesis solutions and the sonoelectrodeposition process was done similarly.

#### *Immobilization of p-ssDNA*

Immobilization of p-ssDNA probe was performed by dropping  $10.0 \text{ }\mu\text{L}$  of  $10.0 \text{ }\mu\text{mol dm}^{-3}$  p-ssDNA solution dissolved in Tris on the Au/nAu electrode surface and kept refrigerated at  $4 \text{ }^\circ\text{C}$  for  $8 \text{ h}$ . Then the electrode was rinsed with Tris. The DNA-modified Au/nAu electrode was further treated with  $1.0 \text{ mmol dm}^{-3}$  6-Mercapto-1-hexanol at room temperature for  $30 \text{ min}$  to obtain a well aligned p-ssDNA monolayer. Then the electrode was washed again with Tris and double distilled water, respectively, to remove unspecific absorbed p-ssDNA. The obtained electrode was denoted as the genosensor.

#### *Hybridization*

The hybridization process was performed by immersing the genosensor into Tris containing various concentrations of t-ssDNA for  $1 \text{ h}$  at  $37 \text{ }^\circ\text{C}$ . Then, the electrode was rinsed with Tris to remove the un-hybridized t-ssDNA, and then it was incubated in a

solution containing Tris + NaCl ( $20 \text{ mmol dm}^{-3}$ ) + methylene blue (MB,  $20 \text{ } \mu\text{mol dm}^{-3}$ ) for 5 min at  $37 \text{ }^\circ\text{C}$ . Finally, the electrode was rinsed with Tris to remove the physically absorbed MB.

### *Electrochemical measurements*

The real surface area of the Au/nAu electrode was measured electrochemically. The Au/nAu electrode was transferred to a solution of KCl ( $0.5 \text{ mol dm}^{-3}$ ) containing  $\text{K}_4[\text{Fe}(\text{CN})_6]$  ( $0.5 \text{ mmol dm}^{-3}$ ) and cyclic voltammograms at different potential sweep rates were measured. Using the Randles-Sevcik equation (Bard et al., 2001) and the value of  $7.60 \times 10^{-6} \text{ cm s}^{-1}$  for the diffusion coefficient of  $[\text{Fe}(\text{CN})_6]^{4-}$  (Wang et al., 2007), we obtained the real surface area of the Au/nAu electrode.

OCP measurements of the Au/nAu electrode during the self assembling process of p-ssDNA were performed using a digital voltmeter of MS8340B Digital Multimeter, Mastech (China) connected to a PC and an Au/nAu screen-printed electrode refrigerated during the measurements.

Electrochemical detection of the DNA hybridization was performed in an electrochemical cell containing 10 mL Tris by recording cyclic voltammograms (CVs) and differential pulse voltammograms (DPVs) for the reduction peak of intercalated MB. The parameters of DPV recording were pulse width of 25 mV, a pulse time of 50 ms, and a scan rate of  $10 \text{ mV s}^{-1}$ . The concentration of t-ssDNA was quantified as the MB reduction peak current.

### *Bacteria culture, human samples, and genomic DNA extraction*

*Brucella* agar culture medium with the addition of 5% horse blood was used for the cultivation of *Brucella* organisms by incubation at  $35\pm 2$  °C for 48-72 h.

7 human serum samples with Brucellosis (Wright and 2ME tests were positive in all samples) were provided from veterinary administration of Fars province. It should be noted that a healthy blood sample was evaluated with suspicious samples. From 7 human serum samples with Brucellosis, 6 were measured after amplification by PCR and one sample was measured without amplification. Before performing the required investigations, the genomes were placed for 5 min at 90 ° C.
